# Supplementary material for: Mediator dynamics during heat shock in budding yeast
Source: HighWire-hosted journal article supplement (doi:10.1101/gr.275750.121), 2021-11-16
Supplement: Supplemental_Table_S1.xlsx [file Supplemental_Table_S1.xlsx]

## Sheet: Sheet1
Supplemental Table S1. Ratios of Med15 occupancy in kin28-AA yeast compared to the parent strain YFR1321 without and with heat shock and in the presence of rapamycin.
Ratios were calculated after normalizing for number of reads
	No heat shock					15 min heat shock
	Top 300 Med15 occupied promoters					Top 300 Med15 occupied promoters
	YFR1321	kin28AA	kin28AA/YFR1321 no HS			YFR1321	kin28AA	kin28AA/YFR HS15
YAL003W	7388	38076	1.9088		YAL003W	40324	81668	0.800512
YAL005C	9459	32606	1.2767		YAL005C	63590	175108	1.08842
YAL012W	4165	30764	2.73567		YAL012W	21203	101074	1.88418
YAL038W	3293	25372	2.85364		YBL002W	7517	69370	3.6476
YAL069W	28824	45413	0.583529		YBL003C	7713	91370	4.68231
YBL002W	4713	82603	6.49134		YBL015W	45558	110016	0.954488
YBL003C	4505	117317	9.645		YBL029C-A	30419	68486	0.88989
YBL027W	3465	33364	3.56624		YBR009C	8298	63463	3.02292
YBL071C-B	7860	25413	1.19748		YBR010W	11577	78782	2.68974
YBL072C	1903	26390	5.13614		YBR019C	26689	118620	1.75673
YBL074C	2565	69917	10.0956		YBR020W	13408	62807	1.8515
YBR009C	3823	62746	6.0788		YBR067C	21991	79458	1.42814
YBR010W	4145	78188	6.98637		YBR068C	25319	79331	1.23844
YBR048W	4184	32460	2.87338		YBR072W	28759	255420	3.51043
YBR068C	6405	40073	2.31723		YBR077C	24843	71083	1.13094
YBR071W	4758	31378	2.44251		YBR101C	46845	151174	1.27554
YBR078W	5210	35639	2.53352		YBR126C	33868	364971	4.2594
YBR084C-A	4431	27548	2.30263		YBR126W-A	44874	400171	3.52477
YBR088C	2519	40167	5.90578		YBR126W-B	38596	351698	3.6017
YBR092C	2598	24853	3.54304		YCR012W	20204	106940	2.0921
YBR101C	7044	38719	2.03583		YCR021C	23401	154929	2.61684
YBR118W	11454	68891	2.22762		YDL020C	49785	114751	0.91104
YBR126W-A	6582	24020	1.35161		YDL022W	44475	140784	1.25117
YBR189W	3350	27777	3.07098		YDL124W	11993	85776	2.82695
YBR191W	6200	37341	2.23065		YDL125C	14739	90592	2.42941
YBR196C	4173	25055	2.22373		YDR043C	14661	91391	2.46388
YCL036W	4397	24540	2.06707		YDR154C	9093	88656	3.85372
YCL037C	4433	24704	2.06398		YDR155C	30602	219815	2.83914
YCR005C	12771	39138	1.13504		YDR156W	32425	194528	2.37127
YCR012W	4796	26610	2.05495		YDR171W	182133	1146357	2.48777
YCR031C	4136	36038	3.22713		YDR224C	11853	64140	2.13885
YDL020C	3966	28294	2.64227		YDR258C	55224	142270	1.01827
YDL055C	3223	30153	3.46503		YDR309C	31464	92913	1.16719
YDL070W	4122	32792	2.94643		YDR380W	18374	58597	1.26052
YDL075W	3732	26609	2.64072		YDR406W	74944	206659	1.08993
YDL082W	2826	24167	3.16728		YDR525W-A	76969	280609	1.441
YDL083C	3150	28477	3.34827		YEL017C-A	67491	205344	1.20258
YDL133C-A	5232	47307	3.34884		YEL017W	89596	232405	1.02527
YDL147W	2868	27159	3.50728		YEL020C-B	12494	57768	1.82753
YDL148C	2938	24547	3.09445		YEL034W	30336	205435	2.67667
YDL172C	5826	35109	2.23195		YEL044W	28623	71287	0.984407
YDL184C	3484	50192	5.33571		YEL046C	44762	159173	1.40553
YDL191W	4836	33423	2.55974		YEL059W	23081	56184	0.962138
YDR007W	6494	25393	1.44823		YEL060C	33621	118590	1.39417
YDR010C	25167	60685	0.893071		YER017C	19921	71778	1.42416
YDR025W	4659	26904	2.13875		YER053C	9414	110721	4.64874
YDR037W	4435	26081	2.17805		YER088W-B	50969	181579	1.40812
YDR050C	2923	26513	3.35944		YER103W	85239	314398	1.45788
YDR064W	2235	25118	4.1624		YER137C	13239	106124	3.16838
YDR077W	3453	27480	2.94752		YER145C	47567	269487	2.2393
YDR155C	8003	44675	2.06751		YFL014W	8704	112634	5.11482
YDR156W	7463	30299	1.50366		YFL015C	8533	112177	5.19615
YDR171W	11811	30890	0.968651		YFL016C	37022	88503	0.944882
YDR214W	7395	47896	2.39882		YFL063W	70122	93052	0.524507
YDR224C	4688	93979	7.42471		YFR033C	76463	261116	1.34978
YDR225W	4213	51099	4.49218		YGL062W	35616	98496	1.09308
YDR261C-C	9981	40854	1.51599		YGR035C	28290	63056	0.880994
YDR261C-D	9981	40854	1.51599		YGR050C	50426	151771	1.18964
YDR309C	16917	33647	0.736647		YGR055W	25458	75682	1.17503
YDR418W	4279	31908	2.76181		YGR142W	97842	238227	0.962377
YDR430C	2316	26574	4.24966		YGR161C	18254	62992	1.36398
YDR432W	2339	27219	4.31001		YGR161W-C	29343	68308	0.920124
YDR447C	4225	26993	2.36625		YGR192C	26523	147975	2.20519
YDR450W	5872	25629	1.61652		YGR210C	60136	96353	0.633301
YDR471W	2986	27628	3.42686		YGR211W	77112	131098	0.671976
YDR500C	2443	28882	4.37865		YHR054C	35644	173804	1.92732
YDR524C-A	43598	124183	1.05495		YHR054W-A	35998	165531	1.81753
YDR524C-B	22164	86523	1.44584		YHR173C	11140	139243	4.94046
YDR525W	6846	45217	2.44625		YHR183W	11574	228386	7.79948
YDR525W-A	26869	61103	0.842262		YIL155C	8597	73155	3.36338
YEL008W	4311	24350	2.09198		YJL026W	20423	72716	1.40731
YEL017C-A	7354	29948	1.50827		YJL034W	26560	223651	3.3283
YEL021W	8974	31905	1.31677		YJL035C	27723	219828	3.13417
YEL034W	12981	79794	2.27666		YJL042W	24206	99899	1.63124
YEL035C	5418	45624	3.11882		YJR009C	8660	81767	3.73198
YEL045C	27546	40491	0.544423		YJR045C	44416	684893	6.09485
YEL046C	15245	38760	0.941657		YJR046W	49981	674195	5.33163
YEL050C	2170	63632	10.8606		YJR105W	28130	111507	1.56679
YEL071W	15572	43133	1.02589		YJR115W	38487	94994	0.975577
YER001W	4034	25905	2.37839		YJR121W	23661	124334	2.077
YER056C	3005	25368	3.12664		YKL035W	18508	68856	1.47049
YER056C-A	5358	25366	1.75342		YKL060C	14978	118747	3.13363
YER064C	25926	28112	0.401599		YKL085W	17195	75117	1.72669
YER072W	2450	24954	3.77234		YKL096W-A	45609	173372	1.50248
YER073W	2592	27689	3.95648		YKL152C	18512	94773	2.02354
YER074W	6292	32185	1.89453		YKR040C	36610	102729	1.10911
YER103W	4229	30765	2.69436		YKR042W	18635	61352	1.3013
YER117W	4809	31132	2.39766		YLL024C	48005	129255	1.06424
YER137C	7094	26673	1.39257		YLL026W	46696	223177	1.88908
YER137C-A	8676	32602	1.39175		YLL028W	18770	67091	1.4128
YER138C	8676	32602	1.39175		YLL039C	54542	150037	1.08729
YER138W-A	7317	33747	1.7082		YLR055C	56592	198486	1.38629
YER145C	13177	35109	0.98682		YLR056W	31510	142238	1.78421
YFL034C-A	2242	31048	5.12902		YLR099C	13405	74230	2.18873
YFR011C	4420	25365	2.12544		YLR100W	7432	63465	3.37527
YFR032C-A	2801	23887	3.15853		YLR108C	26074	63589	0.963948
YFR033C	16745	39097	0.864758		YLR109W	18769	98361	2.07139
YGL009C	4223	25221	2.21196		YLR110C	24809	118275	1.88436
YGL030W	3345	30281	3.35282		YLR111W	24462	117330	1.89582
YGL076C	2099	24610	4.34246		YLR112W	62583	275410	1.73941
YGL088W	1601	23950	5.54052		YLR216C	29547	174709	2.33712
YGL103W	3411	63967	6.94561		YLR304C	45797	141540	1.22158
YGL123W	2656	39064	5.44734		YLR327C	44467	164602	1.46311
YGL135W	2356	39074	6.14255		YLR437C	47377	203070	1.69417
YGL147C	5210	24965	1.77472		YLR438W	48080	226931	1.86556
YGL188C-A	4154	25215	2.24817		YML100W	50089	208284	1.64359
YGL224C	33292	27787	0.309128		YML101C	61627	191163	1.22606
YGL255W	6810	24075	1.30935		YML101C-A	32272	85339	1.0452
YGR027W-A	5708	25795	1.67374		YMR058W	13757	110620	3.17826
YGR027W-B	5708	25795	1.67374		YMR108W	17579	57043	1.28259
YGR034W	3832	26795	2.58979		YMR122W-A	26961	97147	1.42421
YGR037C	4567	24704	2.00342		YMR135C	30415	89451	1.16246
YGR060W	4449	32955	2.74344		YMR136W	17909	60801	1.3419
YGR085C	2805	33162	4.37869		YMR251W-A	56678	191645	1.33648
YGR142W	10215	42676	1.54733		YMR266W	21120	57954	1.0846
YGR189C	4787	37960	2.93697		YNL006W	48212	153194	1.25593
YGR192C	4069	56712	5.16207		YNL007C	42207	139341	1.30489
YGR210C	5999	35066	2.16493		YNL030W	25436	159145	2.473
YGR211W	7656	51486	2.49071		YNL031C	29673	177228	2.36075
YGR214W	5304	33469	2.33709		YNL036W	25280	141106	2.20622
YHL001W	3249	32071	3.65594		YNL037C	16367	63476	1.53292
YHL015W	1943	25020	4.76926		YNL054W-A	31074	83972	1.06811
YHL033C	2199	45533	7.66897		YNL055C	35551	153530	1.70695
YHR010W	4988	29259	2.17255		YNL063W	11305	83191	2.90861
YHR021C	4669	46060	3.65373		YNL064C	9329	83339	3.53096
YHR049W	3495	34857	3.69385		YNL077W	36558	69757	0.754197
YHR052W-A	12207	37910	1.15022		YNL289W	18969	61282	1.27693
YHR053C	18818	54467	1.072		YNR018W	41275	98277	0.941118
YHR054C	23072	62798	1.00808		YOL052C-A	12483	57786	1.82971
YHR054W-A	23995	64424	0.994405		YOL060C	42670	84850	0.785975
YHR055C	21561	59630	1.02431		YOL109W	26506	101183	1.50884
YHR071W	8167	29569	1.34094		YOR007C	21429	127793	2.35714
YHR128W	2555	25629	3.71516		YOR052C	10138	94909	3.70028
YHR141C	6830	32488	1.76173		YOR053W	12212	77968	2.52353
YHR162W	7001	23819	1.26008		YOR082C	18894	66386	1.38878
YHR173C	2492	61160	9.08983		YOR084W	21302	79904	1.48261
YHR174W	2823	73412	9.63147		YOR136W	49237	187463	1.50489
YHR183W	5545	34048	2.27419		YOR153W	44398	128332	1.14249
YHR208W	2188	35241	5.96537		YOR193W	30847	85413	1.09444
YHR216W	5636	38875	2.55467		YOR246C	27547	58143	0.834262
YIL018W	3537	39979	4.18633		YOR348C	24637	71173	1.14184
YIL052C	3115	28943	3.44129		YOR349W	44029	99673	0.894784
YIL148W	3757	25714	2.53492		YPL106C	35370	98222	1.09762
YJL034W	2652	30982	4.32685		YPL135W	44429	142475	1.26751
YJL035C	2619	31198	4.41192		YPL240C	54378	259803	1.88843
YJL047C-A	3719	50123	4.99168		YPL250C	47147	143471	1.20279
YJL136C	5715	27803	1.80182		YPR036W-A	224099	817801	1.4424
YJL148W	2672	50312	6.97383		YPR065W	21921	71146	1.28283
YJL158C	8252	37588	1.68704		YPR151C	22877	90724	1.56748
YJL159W	3679	24429	2.4593		YAL069W	103400	193368	0.739169
YJL189W	8458	51922	2.27363		YAR035W	34905	113584	1.2862
YJL190C	5623	33724	2.2213		YBL005W	30983	75407	0.961984
YJL191W	3295	38271	4.3018		YBL006C	33174	80611	0.960453
YJL192C	3686	28679	2.88167		YBL071C-B	26412	64750	0.968987
YJR045C	10444	66452	2.35655		YBL075C	12941	57870	1.76752
YJR046W	11397	66171	2.15037		YBL076C	16015	59587	1.47063
YJR048W	10082	39443	1.44897		YBL109W	61712	83588	0.53537
YJR077C	6139	25045	1.51098		YBR071W	11641	60067	2.03951
YJR094W-A	3281	26086	2.94468		YBR082C	28344	87227	1.21638
YJR104C	7326	28363	1.43391		YBR085C-A	16009	59046	1.45783
YJR121W	5728	38318	2.47763		YBR118W	42230	135439	1.26766
YJR145C	4418	29038	2.43432		YBR169C	13791	64756	1.85594
YJR162C	18584	24577	0.489808		YBR191W	19756	60616	1.21274
YKL006W	5120	25694	1.85865		YCL040W	37486	156856	1.65391
YKL054C	2308	27058	4.34206		YCL041C	32830	133074	1.60214
YKL060C	3834	59734	5.7704		YCL042W	22148	110960	1.98021
YKL081W	2216	23860	3.98783		YCL043C	16273	95408	2.31738
YKL096W-A	14535	48643	1.23949		YCL050C	23610	67631	1.13222
YKL097C	19694	55818	1.04973		YDL070W	11735	90267	3.04036
YKL152C	3772	32263	3.16788		YDL174C	14789	57360	1.53303
YKL180W	6159	27623	1.6611		YDR006C	12487	63580	2.01253
YKR046C	3250	32478	3.7012		YDR007W	16619	62144	1.478
YKR047W	3068	31129	3.75791		YDR010C	64209	190681	1.17379
YKR071C	3933	25992	2.44767		YDR050C	16771	79327	1.86957
YKR094C	5383	61195	4.21044		YDR077W	11960	82755	2.73491
YLL024C	8563	63080	2.72836		YDR214W	32487	56737	0.690297
YLL027W	9112	28885	1.17407		YDR231C	17183	75086	1.72719
YLL039C	3488	31476	3.34225		YDR270W	8565	60263	2.78101
YLR044C	2779	57402	7.65023		YDR276C	19225	70942	1.45853
YLR048W	6326	30175	1.76667		YDR381W	10279	60073	2.30998
YLR055C	12791	27380	0.792803		YDR430C	4436	60203	5.36421
YLR056W	9595	39696	1.53228		YDR432W	4589	61253	5.27581
YLR061W	2824	43678	5.72841		YDR524C-A	107679	375970	1.38007
YLR073C	3520	26682	2.80745		YDR524C-B	56132	199164	1.40243
YLR074C	3192	27650	3.20825		YDR525W	12141	67177	2.18698
YLR075W	3524	39294	4.12978		YDR544C	56573	82691	0.577735
YLR110C	9586	86353	3.33639		YEL035C	10723	98643	3.63605
YLR111W	9253	88127	3.52746		YEL045C	86123	243743	1.11865
YLR112W	35579	73613	0.766297		YER035W	25977	73007	1.11085
YLR130C	4210	28079	2.47022		YER053C-A	14581	70542	1.91223
YLR134W	2883	68052	8.74244		YER150W	24087	93604	1.536
YLR162W	38294	50776	0.491093		YER152C	13356	67387	1.99425
YLR162W-A	157903	397493	0.932342		YER154W	11711	62962	2.12502
YLR167W	2904	39110	4.98801		YER177W	20092	74293	1.46152
YLR185W	5497	33590	2.26319		YFL015W-A	23787	73745	1.22538
YLR213C	3355	24042	2.65408		YFL021W	34477	101612	1.16492
YLR214W	4091	30707	2.78		YFL031W	10470	59321	2.23945
YLR216C	3452	36673	3.9347		YFL039C	15871	66002	1.64374
YLR259C	2805	25953	3.42682		YGL037C	11773	66012	2.21623
YLR287C-A	2847	26373	3.4309		YGL063C-A	55357	159119	1.13613
YLR304C	24408	31484	0.477743		YGL072C	35884	93050	1.02493
YLR340W	2526	33946	4.97727		YGR008C	5473	56444	4.07635
YLR342W	2595	26085	3.72297		YGR031C-A	45798	102856	0.887693
YLR344W	3035	24935	3.04289		YGR037C	11089	88772	3.16419
YLR354C	3503	24431	2.58308		YGR086C	30136	135750	1.78047
YLR355C	6956	50372	2.68204		YGR136W	10803	69119	2.52891
YLR364C-A	2429	24627	3.75509		YGR204W	24306	65897	1.0716
YLR399C	10256	32596	1.17712		YGR254W	11015	120202	4.31327
YLR406C	5315	26804	1.86781		YGR284C	10394	59465	2.2613
YLR441C	3969	37852	3.53219		YHR007C-A	18767	66109	1.39234
YLR448W	7577	25328	1.23805		YHR008C	6961	75317	4.27662
YML024W	9323	35268	1.40107		YHR052W-A	21070	89109	1.67162
YML025C	8325	24895	1.10755		YHR053C	49704	451978	3.59423
YML026C	4479	27790	2.29797		YHR055C	50146	434935	3.42821
YML027W	6412	25879	1.49482		YHR104W	13195	77540	2.32271
YML028W	3093	56868	6.80964		YHR137W	21706	57628	1.04938
YML056C	1806	45045	9.23773		YHR141C	27876	72230	1.02416
YML063W	5739	33843	2.18408		YHR174W	15812	154760	3.86858
YML073C	6828	33329	1.80786		YHR217C	75755	114810	0.599029
YML092C	5892	25770	1.6199		YIL101C	14818	86486	2.30694
YMR013C	2663	35062	4.87643		YJL144W	18175	90508	1.9683
YMR058W	12391	24264	0.725258		YJL158C	21764	79035	1.43536
YMR116C	1643	24710	5.57021		YJL159W	9126	98967	4.28637
YMR142C	6085	33001	2.00864		YJL189W	28614	99411	1.3732
YMR186W	4857	45835	3.49515		YJL190C	23356	59023	0.998855
YMR194W	2614	28213	3.99742		YJR048W	23185	103788	1.76937
YMR230W	2160	27564	4.72634		YJR059W	15174	57937	1.50916
YMR242C	3851	29721	2.85842		YJR077C	13457	57060	1.67596
YMR242W-A	3591	29879	3.08168		YJR104C	33011	214295	2.56586
YMR251W-A	10360	26727	0.955491		YJR120W	16236	61400	1.49475
YMR278W	4853	28003	2.13713		YJR162C	43515	76543	0.695258
YMR305C	4984	23928	1.77813		YKL030W	32389	67736	0.826612
YNL006W	4659	38063	3.02584		YKL037W	39189	89742	0.90513
YNL007C	4500	37501	3.0865		YKL044W	20850	61900	1.17345
YNL025C	1617	26840	6.14764		YKL097C	58244	232388	1.57704
YNL030W	10103	122990	4.50875		YKL148C	14317	65394	1.80537
YNL031C	12446	123256	3.66787		YKR046C	8072	61293	3.0013
YNL036W	10191	26258	0.954292		YKR047W	6731	63636	3.73683
YNL037C	5660	24393	1.59619		YLL065W	40445	64765	0.632929
YNL054W-A	8070	24454	1.12231		YLL066W-B	85253	117581	0.545139
YNL055C	8808	27417	1.15287		YLR064W	11467	59775	2.06039
YNL063W	2557	26118	3.78308		YLR099W-A	16401	97616	2.3525
YNL064C	2092	29491	5.22112		YLR162W	58698	173573	1.16879
YNL067W	3381	59947	6.56687		YLR162W-A	70324	458602	2.57758
YNL069C	4896	32459	2.45544		YLR205C	15580	73677	1.86915
YNL104C	3593	24014	2.47539		YLR235C	16422	62286	1.49915
YNL112W	3531	28085	2.94587		YLR255C	25718	75010	1.15282
YNL141W	64755	537048	3.07168		YLR259C	13112	154757	4.6651
YNL162W	5337	28209	1.95761		YLR354C	11100	60232	2.14479
YNL178W	2579	32131	4.61434		YLR399C	41487	182675	1.74039
YNL289W	23566	79513	1.24965		YLR400W	32464	134035	1.63191
YNL300W	6916	28230	1.51179		YLR402W	29303	68284	0.921057
YNL302C	4824	26137	2.00671		YLR414C	12269	61025	1.96598
YNL338W	13958	24349	0.646092		YLR448W	20778	57650	1.09667
YOL040C	3757	30655	3.02201		YLR466C-B	94966	122282	0.508949
YOL086C	3676	38302	3.85907		YML024W	24350	80945	1.31392
YOL109W	8012	26137	1.20823		YML025C	23306	71577	1.21391
YOL120C	3424	31293	3.38493		YML028W	8009	205620	10.1477
YOL121C	2397	28367	4.3831		YML058W	16032	68313	1.68421
YOL127W	3506	26497	2.79912		YML073C	27558	66090	0.947911
YOR007C	3089	31324	3.75574		YML100W-A	37896	105067	1.09585
YOR027W	3174	26836	3.13146		YML130C	15089	115044	3.01358
YOR042W	2101	45073	7.9456		YMR002W	6828	60318	3.49167
YOR063W	3318	34585	3.86054		YMR056C	19087	126998	2.6299
YOR096W	4026	30416	2.79811		YMR086W	18037	65537	1.43616
YOR136W	16943	33685	0.736347		YMR122C	21575	82711	1.51528
YOR204W	3179	32219	3.75368		YMR186W	23221	218096	3.71233
YOR226C	4129	49081	4.40255		YMR265C	39135	100840	1.01847
YOR246C	11331	34886	1.1403		YNL097C-B	24938	79989	1.26779
YOR271C	2792	54472	7.22594		YNL141W	115945	170034	0.579647
YOR293W	5275	28334	1.9894		YNL149C	25739	70329	1.08
YOR298C-A	6160	34551	2.07738		YNL281W	16472	87134	2.09084
YOR312C	3544	27353	2.85856		YNL338W	81617	135734	0.657336
YOR369C	2824	54072	7.0916		YOL085C	17862	60688	1.34293
YOR375C	4028	26303	2.41853		YOL086C	8406	103403	4.86209
YPL079W	3654	23895	2.422		YOR020C	24437	89742	1.45153
YPL080C	2840	25295	3.29877		YOR027W	23923	108736	1.79654
YPL081W	2699	35959	4.93448		YOR042W	5350	70579	5.21436
YPL090C	4833	37825	2.89867		YOR064C	14757	56741	1.51977
YPL106C	5338	44582	3.09327		YOR138C	28136	76840	1.07945
YPL131W	3981	43923	4.08635		YOR204W	9985	69885	2.7664
YPL135W	25197	31995	0.470294		YOR298C-A	28328	167099	2.33151
YPL143W	3591	24412	2.51782		YPL015C	34004	113720	1.32186
YPL240C	6285	40899	2.41015		YPL017C	35443	106106	1.18328
YPL249C-A	7352	33823	1.7039		YPL025C	26762	78716	1.16258
YPL250C	11633	25076	0.798367		YPL048W	17678	59133	1.32214
YPR036W-A	126018	205775	0.604778		YPL049C	18616	57606	1.2231
YPR043W	3874	42621	4.07474		YPL056C	19054	58338	1.21017
YPR074C	2874	26580	3.42535		YPL068C	32016	78208	0.965525
YPR080W	5501	29068	1.95709		YPL112C	28350	69982	0.975692
YPR102C	3409	24836	2.6983		YPL170W	33579	60769	0.715309
YPR124W	3562	30822	3.20482		YPL249C-A	24532	61263	0.987063
YPR132W	3260	33393	3.7938		YPR064W	44553	187302	1.66167
YPR145W	5995	28572	1.76517		YPR154W	28641	130272	1.7978
