# Supplementary material for: Mediator dynamics during heat shock in budding yeast
Source: HighWire-hosted journal article supplement (doi:10.1101/gr.275750.121), 2021-11-16
Supplement: Supplemental_Table_S2.xlsx [file Supplemental_Table_S2.xlsx]

## Sheet: Hsf1_Msn2-4_RP_genes
Supplemental Table S2. Gene sets used in this study.									(Excludes ASC1 from 138 RP genes in Knight et al. 2014)
Hsf1 targets		Rhee-Pugh (2012)		Huisinga et al (2004)		Msn2/4 targets			Ribosomal proteins				From Knight (2014)
Systematic name	Common name					Systematic name	Common name		Systematic name	Common name		Abf1 or Rap1	Hmo1
YLL026W	HSP104	TATA-containing	TAF1-depleted	no call		YAL008W	FUN14		YBR031W	RPL4A	tandem	Abf1	No
YLL039C	UBI4	TATA-containing	TAF1-enriched	no call		YAL017W	PSK1		YDR012W	RPL4B	tandem	Abf1	No
YNL077W	APJ1	TATA-less	TAF1-depleted	no call		YAL028W	FRT2		YLR264W	RPS28B,RPS33B	tandem	Abf1	No
YBR072W	HSP26			SAGA-dominated		YAL034C	FUN19		YLR367W	RPS22B	tandem	Abf1	No
YBR169C	SSE2			SAGA-dominated		YAL060W	BDH1		YOR167C	RPS28A,RPS33A	tandem	Abf1	No
YCR021C	HSP30	TATA-containing	TAF1-depleted	SAGA-dominated		YAL061W	BDH2		YDL081C	RPP1A,RPLA1	convergent	Abf1	No
YDR171W	HSP42	TATA-containing	TAF1-depleted	SAGA-dominated		YAL062W	GDH3		YDR382W	RPP2B,RPL45,YPA1	divergent	Abf1	No
YDR258C	HSP78	TATA-containing	TAF1-depleted	SAGA-dominated		YAR027W	UIP3		YKR057W	RPS21A,RPS25	tandem	Abf1	No
YER103W	SSA4	TATA-less	TAF1-depleted	SAGA-dominated		YBL001C	ECM15		YOR063W	RPL3,MAK8,TCM1	divergent	Abf1	No
YER150W	SPI1	TATA-containing	TAF1-depleted	SAGA-dominated		YBL049W	MOH1		YMR121C	RPL15B	tandem	-	No
YGR250C	RIE1	TATA-containing	TAF1-depleted	SAGA-dominated		YBL064C	PRX1		YBL027W	RPL19B	divergent	Rap1	Yes
YLR327C	TMA10			SAGA-dominated		YBR018C	GAL7		YBL072C	RPS8A	convergent	Rap1	Yes
YNL007C	SIS1	TATA-less	TAF1-depleted	SAGA-dominated		YBR026C	ETR1		YBL087C	RPL23A	tandem	Rap1	No
YOR267C	HRK1	TATA-less	TAF1-depleted	SAGA-dominated		YBR033W	EDS1		YBL092W	RPL32	divergent	Rap1	Yes
YPL240C	HSP82	TATA-containing	TAF1-depleted	SAGA-dominated		YBR037C	SCO1		YBR048W	RPS11B	tandem	Rap1	Yes
YPL250C	ATG41	TATA-containing	TAF1-depleted	SAGA-dominated		YBR046C	ZTA1		YBR084C-A	RPL19A	convergent	Rap1	Yes
YAL005C	SSA1	TATA-containing	TAF1-depleted	TFIID-dominated		YBR052C	RFS1		YBR181C	RPS6B,LPG18,RPS101,RPS102	convergent	Rap1	Yes
YBR101C	FES1	TATA-less	TAF1-enriched	TFIID-dominated		YBR054W	YRO2		YBR189W	RPS9B,RPS13A,SUP46	divergent	Rap1	No
YCL050C	APA1	TATA-less	TAF1-enriched	TFIID-dominated		YBR072W	HSP26		YBR191W	RPL21A,URP1	tandem	Rap1	Yes
YDL020C	RPN4	TATA-containing	TAF1-enriched	TFIID-dominated		YBR117C	TKL2		YCR031C	RPS14A,CRY1,RPL59	convergent	Rap1	No
YDR214W	AHA1	TATA-less	TAF1-depleted	TFIID-dominated		YBR120C	CBP6		YDL061C	RPS29B,YS29B	convergent	Rap1	No
YFL016C	MDJ1	TATA-less	TAF1-enriched	TFIID-dominated		YBR126C	TPS1		YDL075W	RPL31A,RPL34	divergent	Rap1	Yes
YGR142W	BTN2	TATA-containing	TAF1-enriched	TFIID-dominated		YBR132C	AGP2		YDL082W	RPL13A	divergent	Rap1	Yes
YGR211W	ZPR1	TATA-less	TAF1-enriched	TFIID-dominated		YBR147W	RTC2		YDL083C	RPS16B	convergent	Rap1	Yes
YHR082C	KSP1			TFIID-dominated		YBR149W	ARA1		YDL130W	RPP1B,RPL44'',RPLA3	tandem	Rap1	No
YHR104W	GRE3	TATA-containing	TAF1-enriched	TFIID-dominated		YBR169C	SSE2		YDL133C-A	RPL41B	divergent	Rap1	No
YJL034W	KAR2	TATA-containing	TAF1-depleted	TFIID-dominated		YBR214W	SDS24		YDL136W	RPL35B,SOS2	tandem	Rap1	No
YJR045C	SSC1	TATA-less	TAF1-enriched	TFIID-dominated		YBR230C	OM14		YDL184C	RPL41A,RPL47A	convergent	Rap1	No
YLL024C	SSA2	TATA-containing	TAF1-depleted	TFIID-dominated		YBR280C	SAF1		YDL191W	RPL35A,SOS1	tandem	Rap1	No
YLR216C	CPR6	TATA-less	TAF1-enriched	TFIID-dominated		YCL034W	LSB5		YDR025W	RPS11A	tandem	Rap1	Yes
YLR259C	HSP60	TATA-containing	TAF1-depleted	TFIID-dominated		YCL035C	GRX1		YDR064W	RPS13,RPS13B,RPS13C	tandem	Rap1	No
YMR186W	HSC82	TATA-containing	TAF1-depleted	TFIID-dominated		YCL039W	GID7		YDR418W	RPL12B	tandem	Rap1	Yes
YNL064C	YDJ1	TATA-less	TAF1-enriched	TFIID-dominated		YCR011C	ADP1		YDR447C	RPS17B,RP51B,RPL51B	convergent	Rap1	No
YNL281W	HCH1	TATA-less	TAF1-enriched	TFIID-dominated		YCR083W	TRX3		YDR450W	RPS18A	divergent	Rap1	Yes
YNR069C	BSC5	TATA-less	TAF1-enriched	TFIID-dominated		YDL024C	DIA3		YDR471W	RPL27B	divergent	Rap1	Yes
YOL081W	IRA2	TATA-less	TAF1-depleted	TFIID-dominated		YDL085W	NDE2		YDR500C	RPL37B	convergent	Rap1	No
YOR020C	HSP10	TATA-less	TAF1-enriched	TFIID-dominated		YDL110C	TMA17		YEL054C	RPL12A	tandem	Rap1	Yes
YOR027W	STI1	TATA-containing	TAF1-depleted	TFIID-dominated		YDL149W	ATG9		YER056C-A	RPL34A	tandem	Rap1	Yes
YPL106C	SSE1	TATA-less	TAF1-enriched	TFIID-dominated		YDL204W	RTN2		YER074W	RPS24A,RPS24EA	tandem	Rap1	Yes
YPR154W	PIN3	TATA-less	TAF1-depleted	TFIID-dominated		YDL222C	FMP45		YER102W	RPS8B	divergent	Rap1	Yes
YPR158W	CUR1	TATA-less	TAF1-enriched	TFIID-dominated		YDL223C	HBT1		YER117W	RPL23B	divergent	Rap1	Yes
YOR298C-A	MBF1	TATA-less	TAF1-depleted			YDR001C	NTH1		YER131W	RPS26B	divergent	Rap1	No
						YDR032C	PST2		YFR031C-A	RPL2A,RPL5B	tandem	Rap1	Yes
						YDR074W	TPS2		YFR032C-A	RPL29	tandem	Rap1	No
						YDR076W	RAD55		YFR034C-A	RPL22B	tandem	Rap1	No
						YDR085C	AFR1		YGL030W	RPL30	divergent	Rap1	Yes
						YDR096W	GIS1		YGL031C	RPL24A,RPL30A	tandem	Rap1	Yes
						YDR100W	TVP15		YGL076C	RPL7A	tandem	Rap1	No
						YDR148C	KGD2		YGL103W	RPL28,CYH2	divergent	Rap1	No
						YDR178W	SDH4		YGL123W	RPS2,RPS4,SUP138,SUP38,SUP44	divergent	Rap1	No
						YDR202C	RAV2		YGL135W	RPL1B,SSM2	divergent	Rap1	No
						YDR204W	COQ4		YGL147C	RPL9A	convergent	Rap1	No
						YDR247W	VHS1		YGL189C	RPS26A,RPS26	tandem	Rap1	Yes
						YDR436W	PPZ2		YGR027C	RPS25A,RPS31A	convergent	Rap1	No
						YDR451C	YHP1		YGR034W	RPL26B	divergent	Rap1	No
						YDR453C	TSA2		YGR085C	RPL11B	tandem	Rap1	No
						YDR479C	PEX29		YGR118W	RPS23A	divergent	Rap1	Yes
						YDR525W-A	SNA2		YGR148C	RPL24B,RPL30B	tandem	Rap1	Yes
						YDR533C	HSP31		YGR214W	RPS0A,NAB1,NAB1A,YST1	divergent	Rap1	Yes
						YEL011W	GLC3		YHL001W	RPL14B	tandem	Rap1	No
						YEL060C	PRB1		YHL015W	RPS20,URP2	tandem	Rap1	No
						YER035W	EDC2		YHL033C	RPL8A,MAK7	tandem	Rap1	No
						YER053C	PIC2		YHR010W	RPL27A,RPL27	divergent	Rap1	Yes
						YER053C-A	PIC2		YHR021C	RPS27B	tandem	Rap1	Yes
						YER054C	GIP2		YHR141C	RPL42B	convergent	Rap1	Yes
						YER058W	PET117		YHR203C	RPS4B	convergent	Rap1	Yes
						YER067W	RGI1		YIL018W	RPL2B,RPL5A	tandem	Rap1	Yes
						YER096W	SHC1		YIL052C	RPL34B	convergent	Rap1	Yes
						YER103W	SSA4		YIL069C	RPS24B,RPS24EB	tandem	Rap1	Yes
						YER150W	SPI1		YIL133C	RPL16A,RPL13	convergent	Rap1	Yes
						YER182W	FMP10		YIL148W	RPL40A,UBI1	divergent	Rap1	Yes
						YFL014W	HSP12		YJL136C	RPS21B	convergent	Rap1	Yes
						YFL030W	AGX1		YJL177W	RPL17B	divergent	Rap1	Yes
						YFR015C	GSY1		YJL189W	RPL39,PUB2,RPL46,SPB2	divergent	Rap1	Yes
						YFR017C	IGD1		YJL190C	RPS22A,RPS24	convergent	Rap1	Yes
						YFR049W	YMR31		YJL191W	RPS14B,CRY2	divergent	Rap1	No
						YFR053C	HXK1		YJR094W-A	RPL43B	divergent	Rap1	No
						YGL045W	RIM8		YJR123W	RPS5	tandem	Rap1	Yes
						YGL096W	TOS8		YJR145C	RPS4A	convergent	Rap1	Yes
						YGL104C	VPS73		YKL006W	RPL14A	divergent	Rap1	Yes
						YGL184C	STR3		YKL156W	RPS27A	tandem	Rap1	No
						YGR008C	STF2		YKL180W	RPL17A,RPL17	tandem	Rap1	Yes
						YGR043C	NQM1		YKR094C	RPL40B,UBI2	convergent	Rap1	No
						YGR052W	FMP48		YLL045C	RPL8B,KRB1,SCL41	tandem	Rap1	No
						YGR070W	ROM1		YLR029C	RPL15A,RPL10A	tandem	Rap1	No
						YGR086C	PIL1		YLR048W	RPS0B,NAB1B,YST2	divergent	Rap1	Yes
						YGR088W	CTT1		YLR061W	RPL22A	tandem	Rap1	No
						YGR143W	SKN1		YLR075W	RPL10,GRC5,QSR1	divergent	Rap1	No
						YGR194C	XKS1		YLR167W	RPS31,RPS37,UBI3	divergent	Rap1	No
						YGR255C	COQ6		YLR185W	RPL37A	tandem	Rap1	Yes
						YGR256W	GND2		YLR287C-A	RPS30A	tandem	Rap1	No
						YHL021C	AIM17		YLR325C	RPL38	convergent	Rap1	No
						YHL035C	VMR1		YLR333C	RPS25B	tandem	Rap1	No
						YHL036W	MUP3		YLR340W	RPP0,RPL10E	divergent	Rap1	No
						YHR008C	SOD2		YLR344W	RPL26A	tandem	Rap1	No
						YHR016C	YSC84		YLR388W	RPS29A	divergent	Rap1	No
						YHR087W	RTC3		YLR406C	RPL31B	convergent	Rap1	Yes
						YHR096C	HXT5		YLR441C	RPS1A,RP10A	tandem	Rap1	No
						YHR104W	GRE3		YLR448W	RPL6B	divergent	Rap1	Yes
						YHR106W	TRR2		YML024W	RPS17A,RP51A,RPL51A	divergent	Rap1	Yes
						YHR139C	SPS100		YML026C	RPS18B	convergent	Rap1	Yes
						YHR195W	NVJ1		YML063W	RPS1B,PLC2,RP10B	divergent	Rap1	Yes
						YHR198C	AIM18		YML073C	RPL6A,YL16A	tandem	Rap1	Yes
						YHR209W	CRG1		YMR142C	RPL13B	#REF!	Rap1	Yes
						YIL017C	VID28		YMR143W	RPS16A	divergent	Rap1	Yes
						YIL045W	PIG2		YMR194W	RPL36A,RPL39B	divergent	Rap1	No
						YIL050W	PCL7		YMR230W	RPS10B	tandem	Rap1	No
						YIL065C	FIS1		YMR242C	RPL20A,RPL18A2	convergent	Rap1	Yes
						YIL087C	AIM19		YNL067W	RPL9B	tandem	Rap1	No
						YIL098C	FMC1		YNL069C	RPL16B,RP23	convergent	Rap1	Yes
						YIL099W	SGA1		YNL096C	RPS7B	convergent	Rap1	Yes
						YIL101C	XBP1		YNL162W	RPL42A	tandem	Rap1	Yes
						YIL107C	PFK26		YNL178W	RPS3,SUF14	divergent	Rap1	No
						YIL111W	COX5B		YNL301C	RPL18B,RP28B	tandem	Rap1	No
						YIL113W	SDP1		YNL302C	RPS19B,RP55B	convergent	Rap1	Yes
						YIL124W	AYR1		YOL039W	RPP2A,RPL44,RPLA2	divergent	Rap1	Yes
						YIL136W	OM45		YOL040C	RPS15,RPS21	tandem	Rap1	Yes
						YIL155C	GUT2		YOL120C	RPL18A,RP28A	tandem	Rap1	No
						YIR017C	MET28		YOL121C	RPS19A	tandem	Rap1	No
						YIR038C	GTT1		YOL127W	RPL25	divergent	Rap1	Yes
						YJL141C	YAK1		YOR096W	RPS7A,RPS30	divergent	Rap1	Yes
						YJL151C	SNA3		YOR182C	RPS30B	convergent	Rap1	No
						YJL155C	FBP26		YOR234C	RPL33B	convergent	Rap1	Yes
						YJL161W	FMP33		YOR293W	RPS10A	divergent	Rap1	Yes
						YJR008W	MHO1		YOR312C	RPL20B,RPL18A1	tandem	Rap1	Yes
						YJR036C	HUL4		YOR369C	RPS12	convergent	Rap1	No
						YJR059W	PTK2		YPL079W	RPL21B	divergent	Rap1	No
						YJR104C	SOD1		YPL081W	RPS9A	divergent	Rap1	No
						YKL026C	GPX1		YPL090C	RPS6A	convergent	Rap1	Yes
						YKL065C	YET1		YPL131W	RPL5,LPI14,RPL1	tandem	Rap1	No
						YKL067W	YNK1		YPL143W	RPL33A	divergent	Rap1	Yes
						YKL085W	MDH1		YPL198W	RPL7B	divergent	Rap1	No
						YKL090W	CUE2		YPL220W	RPL1A,SSM1	tandem	Rap1	No
						YKL124W	SSH4		YPL249C-A	RPL36B	tandem	Rap1	Yes
						YKL140W	TGL1		YPR043W	RPL43A	divergent	Rap1	No
						YKL142W	MRP8		YPR102C	RPL11A	convergent	Rap1	No
						YKL150W	MCR1		YPR132W	RPS23B	divergent	Rap1	Yes
						YKL163W	PIR3
						YKR049C	FMP46
						YKR067W	GPT2
						YKR076W	ECM4
						YLL041C	SDH2
						YLR028C	ADE16
						YLR070C	XYL2
						YLR080W	EMP46
						YLR109W	AHP1
						YLR178C	TFS1
						YLR201C	COQ9
						YLR258W	GSY2
						YLR327C	TMA10
						YLR356W	ATG33
						YLR438W	CAR2
						YML004C	GLO1
						YML030W	RCF1
						YML100W	TSL1
						YML120C	NDI1
						YML128C	MSC1
						YMR025W	CSI1
						YMR031C	EIS1
						YMR081C	ISF1
						YMR105C	PGM2
						YMR118C	SHH3
						YMR139W	RIM11
						YMR152W	YIM1
						YMR175W	SIP18
						YMR250W	GAD1
						YMR251W	GTO3
						YMR251W-A	GTO3
						YMR261C	TPS3
						YMR271C	URA10
						YMR291W	TDA1
						YMR297W	PRC1
						YNL014W	HEF3
						YNL015W	PBI2
						YNL042W	BOP3
						YNL055C	POR1
						YNL160W	YGP1
						YNL274C	GOR1
						YNL305C	BXI1
						YNR001C	CIT1
						YOL084W	PHM7
						YOL126C	MDH2
						YOL129W	VPS68
						YOL155C	HPF1
						YOR028C	CIN5
						YOR031W	CRS5
						YOR040W	GLO4
						YOR044W	IRC23
						YOR120W	GCY1
						YOR134W	BAG7
						YOR173W	DCS2
						YOR185C	GSP2
						YOR220W	RCN2
						YOR285W	RDL1
						YOR348C	PUT4
						YOR374W	ALD4
						YOR382W	FIT2
						YPL003W	ULA1
						YPL004C	LSP1
						YPL006W	NCR1
						YPL017C	IRC15
						YPL123C	RNY1
						YPL154C	PEP4
						YPL186C	UIP4
						YPL189C-A	COA2
						YPL219W	PCL8
						YPL230W	USV1
						YPR026W	ATH1
						YPR091C	NVJ2
						YPR149W	NCE102
						YPR160W	GPH1
						YPR184W	GDB1
						YPR192W	AQY1

## Sheet: UAS genes
Systematic name	Common name
From Jeronimo et al. (2016) Mol Cell 64: 455
Systematic name	Common name		Down in HS (non-RP)	Hmo1		Not down in HS
YAL061W	BDH2		YEL017C-A	high		YAL053W
YAL053W	FLC2		YKR042W	high		YAL061W
YAL040C	CLN3		YOL109W	high		YBL007C
YAL038W	CDC19		YOR153W	high		YBL033C
YAL003W	EFB1		YOR344C	high		YBL045C
YBL045C	COR1		YAL003W	low		YBR007C
YBL041W	PRE7		YAL038W	low		YBR008C
YBL033C	RIB1		YAL040C	low		YBR053C
YBL029W	YBL029W		YBL002W	low		YBR054W
YBL028C	YBL028C		YBR009C	low		YBR066C
YBL007C	SLA1		YBR068C	low		YBR067C
YBL002W	HTB2		YBR078W	low		YBR072W
YBR007C	DSF2		YBR106W	low		YBR082C
YBR008C	FLR1		YBR118W	low		YBR083W
YBR009C	HHF1		YBR158W	low		YBR085C-A
YBR048W	RPS11B		YCR024C-A	low		YBR101C
YBR053C	YBR053C		YDL055C	low		YBR150C
YBR054W	YRO2		YDR033W	low		YCL030C
YBR066C	NRG2		YDR133C	low		YCL040W
YBR067C	TIP1		YDR157W	low		YCR012W
YBR068C	BAP2		YDR224C	low		YCR021C
YBR072W	HSP26		YDR233C	low		YCR061W
YBR078W	ECM33		YDR345C	low		YDL020C
YBR082C	UBC4		YDR385W	low		YDL022W
YBR083W	TEC1		YDR508C	low		YDL048C
YBR084C-A	RPL19A		YDR524C-B	low		YDL125C
YBR085C-A	YBR085C-A		YEL034W	low		YDL227C
YBR101C	FES1		YEL040W	low		YDR040C
YBR106W	PHO88		YEL046C	low		YDR043C
YBR112C	CYC8		YEL063C	low		YDR074W
YBR118W	TEF2		YER001W	low		YDR096W
YBR150C	TBS1		YER036C	low		YDR171W
YBR157C	ICS2		YER056C	low		YDR214W
YBR158W	AMN1		YER064C	low		YDR216W
YBR162W-A	YSY6		YER070W	low		YDR222W
YBR196C	PGI1		YER073W	low		YDR247W
YBR196C-B	YBR196C-B		YER091C	low		YDR258C
YBR202W	MCM7		YER124C	low		YDR259C
YCL040W	GLK1		YFL039C	low		YDR275W
YCL030C	HIS4		YGL008C	low		YDR276C
YCL025C	AGP1		YGL028C	low		YDR277C
YCR005C	CIT2		YGL055W	low		YDR342C
YCR012W	PGK1		YGL089C	low		YDR343C
YCR021C	HSP30		YGL209W	low		YDR406W
YCR024C-A	PMP1		YGL253W	low		YDR445C
YCR037C	PHO87		YGR055W	low		YDR452W
YCR061W	YCR061W		YGR189C	low		YDR487C
YCR065W	HCM1		YGR229C	low		YDR490C
YDL227C	HO		YGR234W	low		YDR533C
YDL227C	HO		YGR279C	low		YEL008C-A
YDL184C	RPL41A		YHR007C	low		YEL060C
YDL182W	LYS20		YHR094C	low		YER035W
YDL171C	GLT1		YHR143W	low		YER046W
YDL127W	PCL2		YHR162W	low		YER053C-A
YDL125C	HNT1		YHR179W	low		YER062C
YDL055C	PSA1		YIL053W	low		YER069W
YDL048C	STP4		YIL118W	low		YER103W
YDL037C	BSC1		YJL148W	low		YER146W
YDL022W	GPD1		YJL158C	low		YER150W
YDL020C	RPN4		YJL159W	low		YFL016C
YDR011W	SNQ2		YJR048W	low		YFL031W
YDR033W	MRH1		YKL060C	low		YFL056C
YDR040C	ENA1		YKL164C	low		YFR053C
YDR043C	NRG1		YKL182W	low		YGL013C
YDR046C	BAP3		YKR071C	low		YGL036W
YDR050C	TPI1		YLR040C	low		YGL062W
YDR055W	PST1		YLR044C	low		YGL071W
YDR072C	IPT1		YLR056W	low		YGL125W
YDR074W	TPS2		YLR110C	low		YGL178W
YDR077W	SED1		YLR130C	low		YGR032W
YDR096W	GIS1		YLR249W	low		YGR052W
YDR133C	YDR133C		YLR286C	low		YGR070W
YDR133C	YDR133C		YLR300W	low		YGR086C
YDR152W	GIR2		YLR342W	low		YGR097W
YDR157W	YDR157W		YLR355C	low		YGR142W
YDR171W	HSP42		YLR413W	low		YGR143W
YDR186C	YDR186C		YML008C	low		YGR161C
YDR214W	AHA1		YML116W	low		YGR180C
YDR216W	ADR1		YML123C	low		YGR197C
YDR222W	YDR222W		YMR011W	low		YGR202C
YDR224C	HTB1		YMR015C	low		YGR203W
YDR233C	RTN1		YMR108W	low		YGR209C
YDR247W	VHS1		YMR199W	low		YGR210C
YDR247W	VHS1		YMR205C	low		YGR250C
YDR258C	HSP78		YMR290C	low		YGR254W
YDR259C	YAP6		YMR305C	low		YGR281W
YDR275W	BSC2		YMR307W	low		YHL004W
YDR276C	PMP3		YNL030W	low		YHL024W
YDR277C	MTH1		YNL066W	low		YHL029C
YDR297W	SUR2		YNL104C	low		YHR048W
YDR309C	GIC2		YNL231C	low		YHR092C
YDR342C	HXT7		YNL289W	low		YHR096C
YDR343C	HXT6		YNL327W	low		YHR177W
YDR343C	HXT6		YOL086C	low		YIL056W
YDR345C	HXT3		YOL136C	low		YIL100C-A
YDR379C-A	YDR379C-A		YOR064C	low		YIL119C
YDR385W	EFT2		YOR247W	low		YIR016W
YDR406W	PDR15		YOR302W	low		YIR017C
YDR441C	APT2		YOR306C	low		YIR018C-A
YDR445C	YDR445C		YOR327C	low		YJL035C
YDR449C	UTP6		YOR342C	low		YJL042W
YDR452W	PPN1		YPL057C	low		YJL052W
YDR487C	RIB3		YPL061W	low		YJL076W
YDR490C	PKH1		YPL117C	low		YJL079C
YDR500C	RPL37B		YPL177C	low		YJL088W
YDR508C	GNP1		YPL187W	low		YJL116C
YDR524C-B	YDR524C-B		YPL256C	low		YJL133W
YDR533C	HSP31		YPR035W	low		YJL178C
YIL123W	SIM1		YPR074C	low		YJL194W
YIL119C	RPI1		YPR080W	low		YJL200C
YIL118W	RHO3		YBL028C	#		YJL217W
YIL117C	PRM5		YGR060W	*		YJR005W
YIL100C-A	YIL100C-A		YKL096W-A	*		YJR045C
YIL056W	VHR1		YKR093W	*		YJR094C
YIL053W	RHR2		YMR122W-A	*		YJR109C
YIR016W	YIR016W		YPR145W	*		YJR113C
YIR017C	MET28					YKL030W
YIR018C-A	YIR018C-A		*fell between "high" and "low" Hmo1 binding groups			YKL035W
YEL071W	DLD3		#upstream of RPL19B			YKL062W
YEL063C	CAN1					YKL071W
YEL060C	PRB1					YKL103C
YEL046C	GLY1					YKL201C
YEL040W	UTR2					YKR011C
YEL034W	HYP2					YKR052C
YEL017C-A	PMP2					YKR076W
YEL008C-A	YEL008C-A					YLL019C
YER001W	MNN1					YLL024C
YER035W	EDC2					YLL026W
YER036C	ARB1					YLL027W
YER046W	SPO73					YLL039C
YER053C-A	YER053C-A					YLL052C
YER056C	FCY2					YLL055W
YER062C	HOR2					YLL060C
YER064C	VHR2					YLR099W-A
YER069W	ARG5,6					YLR109W
YER070W	RNR1					YLR113W
YER073W	ALD5					YLR142W
YER074W	RPS24A					YLR256W
YER088C	DOT6					YLR259C
YER091C	MET6					YLR267W
YER103W	SSA4					YLR327C
YER124C	DSE1					YLR328W
YER146W	LSM5					YLR346C
YER150W	SPI1					YLR399C
YER158W-A	YER158W-A					YLR402W
YER168C	CCA1					YLR414C
YER177W	BMH1					YLR438W
YFL056C	AAD6					YML028W
YFL039C	ACT1					YML053C
YFL031W	HAC1					YML091C
YFL024C	EPL1					YML100W
YFL022C	FRS2					YML130C
YFL016C	MDJ1					YMR008C
YFR053C	HXK1					YMR017W
YGL255W	ZRT1					YMR031C
YGL253W	HXK2					YMR081C
YGL209W	MIG2					YMR102C
YGL178W	MPT5					YMR135C
YGL162W	SUT1					YMR173W
YGL125W	MET13					YMR177W
YGL123W	RPS2					YMR186W
YGL103W	RPL28					YMR244C-A
YGL089C	MF(ALPHA)2					YMR251W-A
YGL071W	AFT1					YMR265C
YGL062W	PYC1					YNL007C
YGL055W	OLE1					YNL015W
YGL038C	OCH1					YNL077W
YGL036W	YGL036W					YNL097W-A
YGL028C	SCW11					YNL144C
YGL013C	PDR1					YNL147W
YGL008C	PMA1					YNL160W
YGR014W	MSB2					YNL179C
YGR032W	GSC2					YNL241C
YGR033C	TIM21					YNL281W
YGR035C	YGR035C					YNL283C
YGR041W	BUD9					YNR044W
YGR052W	FMP48					YNR060W
YGR055W	MUP1					YNR069C
YGR060W	ERG25					YOL021C
YGR070W	ROM1					YOL052C-A
YGR086C	PIL1					YOL058W
YGR097W	ASK10					YOL060C
YGR108W	CLB1					YOL081W
YGR118W	RPS23A					YOL082W
YGR138C	TPO2					YOL113W
YGR142W	BTN2					YOL117W
YGR143W	SKN1					YOL126C
YGR146C	ECL1					YOL151W
YGR148C	RPL24B					YOL152W
YGR161C	RTS3					YOL158C
YGR180C	RNR4					YOR020C
YGR189C	CRH1					YOR027W
YGR192C	TDH3					YOR028C
YGR197C	SNG1					YOR032C
YGR203W	YCH1					YOR049C
YGR202C	PCT1					YOR062C
YGR209C	TRX2					YOR066W
YGR210C	YGR210C					YOR099W
YGR214W	RPS0A					YOR136W
YGR218W	CRM1					YOR178C
YGR229C	SMI1					YOR227W
YGR234W	YHB1					YOR230W
YGR249W	MGA1					YOR267C
YGR250C	YGR250C					YOR268C
YGR254W	ENO1					YOR274W
YGR279C	SCW4					YOR298C-A
YGR281W	YOR1					YOR317W
YHL029C	OCA5					YOR348C
YHL024W	RIM4					YOR349W
YHL004W	MRP4					YOR382W
YHL004W	MRP4					YPL014W
YHR005C	GPA1					YPL017C
YHR007C	ERG11					YPL026C
YHR010W	RPL27A					YPL066W
YHR048W	YHK8					YPL156C
YHR071W	PCL5					YPL170W
YHR092C	HXT4					YPL189W
YHR094C	HXT1					YPL230W
YHR096C	HXT5					YPL239W
YHR136C	SPL2					YPL250C
YHR141C	RPL42B					YPR013C
YHR143W	DSE2					YPR015C
YHR162W	MPC2					YPR036W-A
YHR174W	ENO2					YPR149W
YHR177W	YHR177W					YPR154W
YHR179W	OYE2					YPR158C-C
YJL217W	REE1					YPR158W
YJL200C	ACO2					YPR160W
YJL194W	CDC6					YPR184W
YJL178C	ATG27					YPR192W
YJL159W	HSP150					YPR196W
YJL158C	CIS3
YJL148W	RPA34
YJL133W	MRS3
YJL130C	URA2
YJL116C	NCA3
YJL101C	GSH1
YJL088W	ARG3
YJL079C	PRY1
YJL076W	NET1
YJL052W	TDH1
YJL042W	MHP1
YJL035C	TAD2
YJR005W	APL1
YJR009C	TDH2
YJR045C	SSC1
YJR048W	CYC1
YJR094C	IME1
YJR105W	ADO1
YJR109C	CPA2
YJR113C	RSM7
YJR123W	RPS5
YJR145C	RPS4A
YJR148W	BAT2
YKL201C	MNN4
YKL185W	ASH1
YKL182W	FAS1
YKL164C	PIR1
YKL152C	GPM1
YKL110C	KTI12
YKL109W	HAP4
YKL104C	GFA1
YKL103C	APE1
YKL101W	HSL1
YKL096W-A	CWP2
YKL096W	CWP1
YKL071W	YKL071W
YKL062W	MSN4
YKL060C	FBA1
YKL051W	SFK1
YKL035W	UGP1
YKL030W	YKL030W
YKL028W	TFA1
YKL008C	LAC1
YKR011C	YKR011C
YKR042W	UTH1
YKR052C	MRS4
YKR071C	DRE2
YKR076W	ECM4
YKR080W	MTD1
YKR093W	PTR2
YLL060C	GTT2
YLL055W	YCT1
YLL052C	AQY2
YLL039C	UBI4
YLL028W	TPO1
YLL027W	ISA1
YLL026W	HSP104
YLL024C	SSA2
YLL019C	KNS1
YLL013C	PUF3
YLR040C	YLR040C
YLR044C	PDC1
YLR056W	ERG3
YLR075W	RPL10
YLR084C	RAX2
YLR094C	GIS3
YLR099W-A	MIM2
YLR109W	AHP1
YLR110C	CCW12
YLR113W	HOG1
YLR130C	ZRT2
YLR142W	PUT1
YLR212C	TUB4
YLR214W	FRE1
YLR249W	YEF3
YLR254C	NDL1
YLR256W	HAP1
YLR257W	YLR257W
YLR259C	HSP60
YLR267W	BOP2
YLR278C	YLR278C
YLR286C	CTS1
YLR300W	EXG1
YLR304C	ACO1
YLR312W-A	MRPL15
YLR325C	RPL38
YLR327C	TMA10
YLR328W	NMA1
YLR332W	MID2
YLR333C	RPS25B
YLR342W	FKS1
YLR346C	YLR346C
YLR347C	KAP95
YLR355C	ILV5
YLR399C	BDF1
YLR399C	BDF1
YLR402W	YLR402W
YLR486C
YLR413W	YLR413W
YLR413W	YLR413W
YLR414C	PUN1
YLR438W	CAR2
YML130C	ERO1
YML123C	PHO84
YML116W	ATR1
YML100W	TSL1
YML091C	RPM2
YML075C	HMG1
YML053C	YML053C
YML028W	TSA1
YML027W	YOX1
YML024W	RPS17A
YML008C	ERG6
YMR008C	PLB1
YMR011W	HXT2
YMR015C	ERG5
YMR017W	SPO20
YMR031C	EIS1
YMR058W	FET3
YMR070W	MOT3
YMR081C	ISF1
YMR083W	ADH3
YMR102C	YMR102C
YMR108W	ILV2
YMR122W-A	YMR122W-A
YMR135C	GID8
YMR143W	RPS16A
YMR145C	NDE1
YMR173W	DDR48
YMR177W	MMT1
YMR186W	HSC82
YMR194C-A	YMR194C-A
YMR199W	CLN1
YMR205C	PFK2
YMR240C	CUS1
YMR244C-A	COA6
YMR251W-A	HOR7
YMR265C	YMR265C
YMR290C	HAS1
YMR296C	LCB1
YMR305C	SCW10
YMR307W	GAS1
YMR319C	FET4
YNL327W	EGT2
YNL300W	TOS6
YNL289W	PCL1
YNL283C	WSC2
YNL281W	HCH1
YNL241C	ZWF1
YNL231C	PDR16
YNL179C	YNL179C
YNL178W	RPS3
YNL178W	RPS3
YNL160W	YGP1
YNL147W	LSM7
YNL144C	YNL144C
YNL134C	YNL134C
YNL104C	LEU4
YNL097W-A	YNL097W-A
YNL077W	APJ1
YNL066W	SUN4
YNL065W	AQR1
YNL064C	YDJ1
YNL036W	NCE103
YNL030W	HHF2
YNL015W	PBI2
YNL007C	SIS1
YNR013C	PHO91
YNR016C	ACC1
YNR018W	RCF2
YNR044W	AGA1
YNR060W	FRE4
YNR067C	DSE4
YNR069C	BSC5
YOL158C	ENB1
YOL152W	FRE7
YOL151W	GRE2
YOL136C	PFK27
YOL126C	MDH2
YOL117W	RRI2
YOL113W	SKM1
YOL109W	ZEO1
YOL086C	ADH1
YOL082W	ATG19
YOL081W	IRA2
YOL060C	MAM3
YOL058W	ARG1
YOL052C-A	DDR2
YOL021C	DIS3
YOL011W	PLB3
YOL007C	CSI2
YOR020C	HSP10
YOR027W	STI1
YOR028C	CIN5
YOR032C	HMS1
YOR049C	RSB1
YOR062C	YOR062C
YOR064C	YNG1
YOR066W	MSA1
YOR099W	KTR1
YOR136W	IDH2
YOR153W	PDR5
YOR178C	GAC1
YOR182C	RPS30B
YOR212W	STE4
YOR227W	HER1
YOR230W	WTM1
YOR234C	RPL33B
YOR247W	SRL1
YOR267C	HRK1
YOR268C	YOR268C
YOR274W	MOD5
YOR293W	RPS10A
YOR298C-A	MBF1
YOR302W	YOR302W
YOR306C	MCH5
YOR315W	SFG1
YOR317W	FAA1
YOR319W	HSH49
YOR327C	SNC2
YOR342C	YOR342C
YOR344C	TYE7
YOR348C	PUT4
YOR349W	CIN1
YOR382W	FIT2
YPL265W	DIP5
YPL256C	CLN2
YPL250C	ICY2
YPL239W	YAR1
YPL230W	USV1
YPL189W	GUP2
YPL187W	MF(ALPHA)1
YPL177C	CUP9
YPL170W	DAP1
YPL156C	PRM4
YER056W-A	RPL34A
YPL135W	ISU1
YPL117C	IDI1
YPL111W	CAR1
YPL106C	SSE1
YPL075W	GCR1
YPL066W	RGL1
YPL061W	ALD6
YPL057C	SUR1
YPL026C	SKS1
YPL017C	IRC15
YPL014W	YPL014W
YPR009W	SUT2
YPR013C	CMR3
YPR015C	YPR015C
YPR035W	GLN1
YPR036W-A	YPR036W-A
YPR063C	YPR063C
YPR074C	TKL1
YPR080W	TEF1
YPR102C	RPL11A
YPR119W	CLB2
YPR124W	CTR1
YPR145W	ASN1
YPR149W	NCE102
YPR154W	PIN3
YPR158W	CUR1
YPR158C-C	YPR158C-C
YPR160W	GPH1
YPR184W	GDB1
YPR192W	AQY1
YPR196W	YPR196W

## Sheet: CdCl2 induced genes
"Momose" genes induced by CdCl2
ORF
YAL067C
YJR010W
YJR137C
YBR072W
YBR253W
YBR294W
YBR296C
YBR296C-A
YDL124W
YDL059C
YDR070C
YDR223W
YDR253C
YIL166C
YIL127C
YIR017C
YFL057C
YFL055W
YFL014W
YFR030W
YKL001C
YKR049C
YOL165C
YOL164W-A
YOL164W
YOL162W
YOR382W
YCL040W
YCL025C
YGL121C
YGR043C
YGR055W
YGR155W
YLL060C
YLL057C
YLL055W
YLR092W
YLR136C
YLR303W
YLR364W
YNL277W-A
YNL277W
YNL259C
YNL015W
YPL223C
YPL054W
YPR167C
YHL040C
YHR008C
YMR058W
