# Supplementary material for: Mediator dynamics during heat shock in budding yeast
Source: HighWire-hosted journal article supplement (doi:10.1101/gr.275750.121), 2021-11-16
Supplement: Supplemental_Table_S3.xlsx [file Supplemental_Table_S3.xlsx]

## Sheet: Sheet1
Supplemental Table S3. Genes from top 500 occupied by Pol II (no heat shock) down-regulated >4x by heat shock.
ORF	Gene name	Pol II HS15/noHS ;normalized to read#	Med15 occ kin28AAR HS15/noHS norm	Pol II noHS rank	Pol II HS15 rank			GO/TF analysis (CERES)
YPL187W	MF(ALPHA)1	0.0631715	0.665982	24	2829			39 genes Pol II down 4x
YLR355C	ILV5	0.064698	1.17337	13	1142			Enriched TFBS
YLR249W	YEF3	0.0757204	1.2077	62	5265			pvalue tfbs Promoters Predicted TFBS
YDL014W	NOP1	0.0762728	2.03229	43	2831			10^-7 LEU3 6 7
YGR234W	YHB1	0.0787886	1.69612	65	4969
YMR116C	ASC1	0.0965794	0.840702	123	5906			Non-enriched TFBS
YEL026W	SNU13	0.108396	0.992821	142	5801			pvalue tfbs Promoters Predicted TFBS				Enriched GO terms
YDL229W	SSB1	0.109722	0.787412	136	5462			0.6734 ABF1 2 3				Pvalue GO term Number of Genes GO ID
YGL008C	PMA1	0.118264	1.47364	35	702			0.1907 ACE2 1 2				10^-6 translation elongation factor activity 4 3746
YHR128W	FUR1	0.121278	0.709743	167	5352			0.4056 AFT2 2 7				10^-4 catalytic activity 11 3824
YGR159C	NSR1	0.13068	0.779702	119	2532			0.2304 ASH1 1 1				10^-5 eukaryotic translation elongation factor 1 complex 3 5853
YLR413W	INA1	0.13753	0.897448	243	6091			0.1346 AZF1 1 1				10^-5 translational elongation 4 6414
YKL081W	TEF4	0.144777	1.35567	217	5079			0.2130 CAD1 1 1				10^-4 branched chain family amino acid biosynthetic process 3 9082
YPR080W	TEF1	0.151206	1.44269	20	278			0.7408 CBF1 1 2				10^-4 gdp binding 2 19003
YER056C	FCY2	0.160189	0.782482	278	5820			0.1691 CIN5 3 4				10^-4 biopolymer biosynthetic process 6 43284
YNR053C	NOG2	0.164279	0.668751	297	6094			0.5542 DAL82 1 4
YOR375C	GDH1	0.168213	1.0572	259	4483			0.4944 DIG1 2 3
YLR074C	BUD20	0.168377	0.854476	230	3626			0.0043 FHL1 5 8
YKL120W	OAC1	0.175074	1.37617	329	6303			0.3637 FKH1 2 8
YML056C	IMD4	0.176178	0.456793	303	5717			0.0319 FKH2 4 9
YBR118W	TEF2	0.182153	2.45749	21	214			0.3953 GAT1 1 1
YPR035W	GLN1	0.184869	1.21529	261	3504			0.0017 GCN4 7 13
YER073W	ALD5	0.186714	0.96049	304	5123			0.1102 GCR1 1 1
YEL046C	GLY1	0.187631	5.13329	126	977			0.2075 GLN3 2 4
YOR247W	SRL1	0.20306	1.41077	201	1560			0.1422 HAP2 2 4
YCL037C	SRO9	0.203405	1.02478	240	2082			0.1997 HAP3 1 2
YNL112W	DBP2	0.207159	0.732375	287	3257			0.0951 HAP5 2 4
YBR068C	BAP2	0.211267	2.47458	139	869			0.1704 HSF1 3 10
YFR055W	IRC7	0.21423	0.941222	410	6049			0.0784 INO2 2 5
YPR145W	ASN1	0.216007	2.26004	257	1999			0.3603 INO4 1 1
YJR016C	ILV3	0.220999	1.63812	408	5775			0.0537 MBP1 4 7
YHR208W	BAT1	0.222181	0.662971	349	4702			0.1309 MCM1 2 3
YMR246W	FAA4	0.226721	1.80813	344	4371			0.7287 MOT3 1 4
YDL055C	PSA1	0.228058	1.71724	108	514			0.0499 NDD1 2 2
YBR078W	ECM33	0.235466	1.59636	218	1181			0.6367 NRG1 1 1
YKL056C	TMA19	0.235678	1.80818	94	451			0.0097 PHD1 4 8
YJL158C	CIS3	0.236193	2.62833	121	524			0.3780 PHO4 1 2
YNL289W	PCL1	0.237049	0.963396	389	4758			0.0187 RAP1 5 11
YLR044C	PDC1	0.238378	1.18509	19	142			0.5642 RCS1 1 1
								0.6302 REB1 2 5
								0.0851 RFX1 1 1
								0.0123 ROX1 4 6
								0.1082 SKN7 3 6
								0.1816 SKO1 1 1
								0.0652 SOK2 3 10
								0.0141 STB1 2 11
								10^-3 STE12 8 15
								10^-3 SWI4 5 18
								0.0022 SWI6 5 20
								0.0718 TEC1 3 11
								0.7191 UME6 1 1
								0.3710 YAP1 1 1
								0.2924 YAP6 1 2
								0.1583 YAP7 3 5
