# Supplementary material for: Mediator dynamics during heat shock in budding yeast
Source: HighWire-hosted journal article supplement (doi:10.1101/gr.275750.121), 2021-11-16
Supplement: Supplemental_Table_S6.xlsx [file Supplemental_Table_S6.xlsx]

## Sheet: Sheet1
Supplemental Table S6. Summary of ChIP-seq experiments.
Experiment	Figure	Yeast strain	Description	ChIP target	File name	Accession number
Pol II ChIP after heat shock	Figure S1	BY4741	no heat shock	Pol II	BY4741_PolII_noHS	PRJNA657372
	Figure S1	BY4741	15 min heat shock	Pol II	BY4741_PolII_HS15	PRJNA657372
	Figure S1	BY4741	30 min heat shock	Pol II	BY4741_PolII_HS30	PRJNA657372
	Figure S1	YFR1321	no heat shock +rapamycin	Pol II	YFR1321_PolII_noHS_rep1	PRJNA657372
	Figure S1	YFR1321	15 min heat shock +rapamycin	Pol II	YFR1321_PolII_HS15_rep1	PRJNA657372
	Figure S1	YFR1321	30 min heat shock +rapamycin	Pol II	YFR1321_PolII_HS30_rep1	PRJNA657372
	Figure 3, S1, S5, S7, S8	YFR1321	no heat shock +rapamycin	Pol II	YFR1321_PolII_noHS_rep2	PRJNA657372
	Figure 3, S1, S5, S7, S8	YFR1321	15 min heat shock +rapamycin	Pol II	YFR1321_PolII_HS15_rep2	PRJNA657372
	Figure S1	YFR1544	no heat shock +rapamycin	Pol II	YFR1544_PolII_noHS_rep1	PRJNA657372
	Figure S1	YFR1544	15 min heat shock +rapamycin	Pol II	YFR1544_PolII_HS15_rep1	PRJNA657372
	Figure S1	YFR1544	30 min heat shock +rapamycin	Pol II	YFR1544_PolII_HS30_rep1	PRJNA657372
	Figure S1	YFR1544	no heat shock +rapamycin	Pol II	YFR1544_PolII_noHS_rep2	PRJNA657372
	Figure S1	YFR1544	15 min heat shock +rapamycin	Pol II	YFR1544_PolII_HS15_rep2	PRJNA657372
Med15 ChIP after heat shock	Figure 1, 2, S4	TBY100 (BY4741 background)	no heat shock	Med15	BY4741_Med15_noHS_rep1	PRJNA657372
	Figure 2, 4, S4, S6	TBY100 (BY4741 background)	15 min heat shock	Med15	BY4741_Med15_HS15_rep1	PRJNA657372
		TBY100 (BY4741 background)	no heat shock	Med15	BY4741_Med15_noHS_rep2	PRJNA657372
	Figure 4, S6	TBY100 (BY4741 background)	15 min heat shock	Med15	BY4741_Med15_HS15_rep2	PRJNA657372
	Figure 4, S6	TBY100 (BY4741 background)	15 min heat shock	Med15	BY4741_Med15_HS15_rep3	PRJNA657372
		RMY1321-G	no heat shock no rapamycin	Med15	YFR1321_Med15_noHS_norapa_rep1	PRJNA657372
	Figure 1, S5, S6, S8	RMY1321-G	no heat shock +rapa	Med15	YFR1321_Med15_noHS_rep1	PRJNA657372
	Figure 1, S5, S6, S8	RMY1321-G	15 min heat shock +rapa	Med15	YFR1321_Med15_HS15_rep1	PRJNA657372
		RMY1321-G	no heat shock no rapamycin	Med15	YFR1321_Med15_noHS_norapa_rep2	PRJNA657372
	Figure 3, 4, S2	RMY1321-G	no heat shock +rapa	Med15	YFR1321_Med15_noHS_rep2	PRJNA657372
	Figure 3, 4, S2	RMY1321-G	15 min heat shock +rapa	Med15	YFR1321_Med15_HS15_rep2	PRJNA657372
	Figure 1, 3, 5B, 6, S4, S6, S7, S8, S9, S10, S12, S13	TBY128 (kin28-AA)	no heat shock +rapa	Med15	kin28AA_Med15_noHS_rep1	PRJNA657372
	Figure 1, 3, 5B, S4, S6, S7, S8, S9, S10, S12	TBY128 (kin28-AA)	15 min heat shock +rapa	Med15	kin28AA_Med15_HS15_rep1	PRJNA657372
	Figure S2	TBY128 (kin28-AA)	no heat shock +rapa	Med15	kin28AA_Med15_noHS_rep2	PRJNA657372
	Figure S2	TBY128 (kin28-AA)	15 min heat shock +rapa	Med15	kin28AA_Med15_HS15_rep2	PRJNA657372
	Figure 5A	TBY128 (kin28-AA)	no heat shock	Med15	Kin28_AAR-Gal11	PRJNA413080
	Figure 5A	EKY20 (kin28-taf1-AA)	no heat shock	Med15	Kin28_Taf1_AAR-Gal11	PRJNA413080
	Figure 5A	EKY22 (kin28-tbp-AA)	no heat shock	Med15	Kin28-TBP_AAR-Gal11	PRJNA413080
	Figure 5A	EKY24 (kin28-rpb3-AA)	no heat shock	Med15	Kin28_Rpb3_AAR-Gal11	PRJNA413080
	Figure 5B, S9, S10	EKY20 (kin28-taf1-AA)	15 min heat shock	Med15	kin28-taf1AA_Med15_HS15_rep1	PRJNA657372
	Figure 5B, S9, S10	EKY22 (kin28-tbp-AA)	15 min heat shock	Med15	kin28-tbpAA_Med15_HS15_rep1	PRJNA657372
	Figure 5B, S9, S10	EKY24 (kin28-rpb3-AA)	15 min heat shock	Med15	kin28-rpb3AA_Med15_HS15_rep1	PRJNA657372
		EKY20 (kin28-taf1-AA)	15 min heat shock	Med15	kin28-taf1AA_Med15_HS15_rep2	PRJNA657372
		EKY22 (kin28-tbp-AA)	15 min heat shock	Med15	kin28-tbpAA_Med15_HS15_rep2	PRJNA657372
		EKY24 (kin28-rpb3-AA)	15 min heat shock	Med15	kin28-rpb3AA_Med15_HS15_rep2	PRJNA657372
		TBY100h	no heat shock	Med15	BY4741-hmo1del_Med15_noHS_rep1	PRJNA657372
	Figure 4, S6	TBY100h	15 min heat shock	Med15	BY4741-hmo1del_Med15_HS15_rep1	PRJNA657372
		TBY100h	no heat shock	Med15	BY4741-hmo1del_Med15_noHS_rep2	PRJNA657372
	Figure 4, S6	TBY100h	15 min heat shock	Med15	BY4741-hmo1del_Med15_HS15_rep2	PRJNA657372
	Figure 4, S6	TBY100h	15 min heat shock	Med15	BY4741-hmo1del_Med15_HS15_rep3	PRJNA657372
	Figure 4, S6	TBY100h	15 min heat shock	Med15	BY4741-hmo1del_Med15_HS15_rep4	PRJNA657372
Med18 ChIP after heat shock	Figure 2	BY4741	no heat shock	Med18	BY4741_Med18_noHS_rep1	PRJNA657372
	Figure 2	BY4741	15 min heat shock	Med18	BY4741_Med18_HS15_rep1	PRJNA657372
		BY4741	no heat shock	Med18	BY4741_Med18_noHS_rep2	PRJNA657372
		BY4741	15 min heat shock	Med18	BY4741_Med18_HS15_rep2	PRJNA657372
	Figure 2, 3, 4, 5B, 6, S13	EKY18 (kin28-AA)	no heat shock +rapa	Med18	kin28AA_Med18_noHS_rep1	PRJNA657372
	Figure 2, 3, 4	EKY18 (kin28-AA)	15 min heat shock +rapa	Med18	kin28AA_Med18_HS15_rep1	PRJNA657372
	Figure 5B, S9, S10	EKY18 (kin28-AA)	no heat shock +rapa	Med18	kin28AA_Med18_noHS_rep2	PRJNA657372
	Figure 5B, S9, S10	EKY18 (kin28-AA)	15 min heat shock +rapa	Med18	kin28AA_Med18_HS15_rep2	PRJNA657372
		EKY18 (kin28-AA)	30 min heat shock +rapa	Med18	kin28AA_Med18_HS30	PRJNA657372
	Figure 5A	EKY19 (kin28-taf1-AA)	no heat shock	Med18	Kin28-Taf1_AAR-Srb5Myc	PRJNA413080
	Figure 5A	EKY21 (kin28-tbp-AA)	no heat shock	Med18	kin28-tbpAA_Med18_noHS	PRJNA657372
	Figure 5A	EKY23 (kin28-rpb3-AA)	no heat shock	Med18	Kin28-Rpb3_AAR-Srb5Myc	PRJNA413080
	Figure 5B, S9, S10	EKY19 (kin28-taf1-AA)	15 min heat shock	Med18	kin28-taf1AA_Med18_HS15_rep2	PRJNA657372
	Figure 5B, S9, S10	EKY21 (kin28-tbp-AA)	15 min heat shock	Med18	kin28-tbpAA_Med18_HS15_rep2	PRJNA657372
	Figure 5B, S9, S10	EKY23 (kin28-rpb3-AA)	15 min heat shock	Med18	kin28-rpb3AA_Med18_HS15_rep2	PRJNA657372
		EKY19 (kin28-taf1-AA)	15 min heat shock	Med18	kin28-taf1AA_Med18_HS15_rep1	PRJNA657372
		EKY21 (kin28-tbp-AA)	15 min heat shock	Med18	kin28-tbpAA_Med18_HS15_rep1	PRJNA657372
		EKY23 (kin28-rpb3-AA)	15 min heat shock	Med18	kin28-rpb3AA_Med18_HS15_rep1	PRJNA657372
		EKY19 (kin28-taf1-AA)	30 min heat shock	Med18	kin28-taf1AA_Med18_HS30	PRJNA657372
		EKY21 (kin28-tbp-AA)	30 min heat shock	Med18	kin28-tbpAA_Med18_HS30	PRJNA657372
		EKY23 (kin28-rpb3-AA)	30 min heat shock	Med18	kin28-rpb3AA_Med18_HS30	PRJNA657372
Pol II ChIP after CdCl2	Figure 6, S13	RMYDS10	No CdCl2 +rapa	Pol II	YFR1321_PolII_noCdCl2	PRJNA657372
	Figure 6, S13	RMYDS10	1 hr CdCl2 +rapa	Pol II	YFR1321_PolII_CdCl2_rep1	PRJNA657372
		RMYDS10	1 hr CdCl2 +rapa	Pol II	YFR1321_PolII_CdCl2_rep2	PRJNA657372
Med15 ChIP after CdCl2	Figure 6, S11, S12, S13	TBY128 (kin28-AA)	1 hr CdCl2 +rapa	Med15	kin28AA_Med15_CdCl2_rep1	PRJNA657372
	Figure S11	TBY128 (kin28-AA)	1 hr CdCl2 +rapa	Med15	kin28AA_Med15_CdCl2_rep2	PRJNA657372
Med18 ChIP after CdCl2	Figure S11	EKY18 (kin28-AA)	1 hr CdCl2 +rapa	Med18	kin28AA_Med18_CdCl2_rep1	PRJNA657372
	Figure 6, S11, S13	EKY18 (kin28-AA)	1 hr CdCl2 +rapa	Med18	kin28AA_Med18_CdCl2_rep2	PRJNA657372
Rap1 ChIP	Figure 2, 4, S7, S12	BY4741	1 hr 37˚C	Rap1	BY4741_Rap1	PRJNA657372
		CBY10037 (rap1-ts)	1 hr 37˚C	Rap1	rap1-ts_Rap1	PRJNA657372
Hmo1 ChIP	Figure 4, S5, S12	W303		Hmo1	Hmo1: Saccharomyces cerevisiae; ChIP-seq	PRJNA261651
Input		YFR1321			YFR1321_input	PRJNA657372
